# Supplementary material
Source: HighWire-hosted journal article supplement (https://nutrition.bmj.com/content/bmjnph-2018-000018)
Supplement: inline-supplementary-material-2 [file inline-supplementary-material-2.docx]

**Supplementary table 1.** Parents/caregivers’ and other adults’ responses to the salt-related attitude about the group most responsible for reducing the amount of salt Australian’s eat

| Attitude | Parents/caregivers of a child/children <18 years of age  (n=840) | | Other adults  (1558) |
| --- | --- | --- | --- |
| Government |  |  | |
| Not at all responsible (%) | 14 | 14 | |
| Somewhat responsible (%) | 24 | 27 | |
| Responsible/very responsible (%) | 59 | 53 | |
| Don’t know* (%) | 3 | 6 | |
| Food manufacturers |  |  | |
| Not at all responsible (%) | 5 | 6 | |
| Somewhat responsible (%) | 10 | 11 | |
| Responsible/very responsible (%) | 83 | 79 | |
| Don’t know* (%) | 2 | 4 | |
| Business (e.g. supermarkets, local markets) |  |  | |
| Not at all responsible (%) | 16 | 18 | |
| Somewhat responsible (%) | 22 | 24 | |
| Responsible/very responsible (%) | 60 | 55 | |
| Don’t know* (%) | 2 | 3 | |
| Chefs preparing foods in restaurants/pubs/cafes |  |  | |
| Not at all responsible (%) | 4 | 5 | |
| Somewhat responsible (%) | 15 | 17 | |
| Responsible/very responsible (%) | 79 | 76 | |
| Don’t know* (%) | 2 | 2 | |
| Friends/family |  |  | |
| Not at all responsible (%) | 10 | 10 | |
| Somewhat responsible (%) | 19 | 23 | |
| Responsible/very responsible (%) | 69 | 66 | |
| Don’t know* (%) | 2 | 1 | |
| Yourself |  |  | |
| Not at all responsible (%) | 1 | 1 | |
| Somewhat responsible (%) | 5 | 5 | |
| Responsible/very responsible (%) | 90 | 89 | |
| Don’t know* (%) | 4 | 5 | |
| Fast food chains |  |  | |
| Not at all responsible (%) | 8 | 8 | |
| Somewhat responsible (%) | 10 | 11 | |
| Responsible/very responsible (%) | 81 | 79 | |
| Don’t know* (%) | 3 | 2 | |

*Response option excluded from analysis due to a low number of participants selecting this option
