# Supplementary material
Source: HighWire-hosted journal article supplement (https://nutrition.bmj.com/content/bmjnph-2018-000018)
Supplement: inline-supplementary-material-6 [file inline-supplementary-material-6.docx]

**Supplementary table 5.** The proportion of parents/caregivers and other adults concerned about salt and other food-related issues

| Question | Parents/caregivers of a child/children <18 years of age (n=840) | Other participants (n=1558) |
| --- | --- | --- |
| Concern about healthy eating |  |  |
| Not at all/not very concerned (%) | 11 | 13 |
| Somewhat concerned (%) | 33 | 36 |
| Very/Extremely concerned (%) | 56 | 51 |
| The amount of sugar in food |  |  |
| Not at all/not very concerned (%) | 7 | 12 |
| Somewhat concerned (%) | 30 | 30 |
| Very/Extremely concerned (%) | 63 | 58 |
| The amount of salt in food |  |  |
| Not at all/not very concerned (%) | 14 | 17 |
| Somewhat concerned (%) | 37 | 37 |
| Very/Extremely concerned (%) | 49 | 46 |
| The amount of fat in food |  |  |
| Not at all/not very concerned (%) | 10 | 15 |
| Somewhat concerned (%) | 35 | 36 |
| Very/Extremely concerned (%) | 55 | 49 |
| The amount of saturated fat in food |  |  |
| Not at all/not very concerned (%) | 7 | 13 |
| Somewhat concerned (%) | 31 | 29 |
| Very/Extremely concerned (%) | 62 | 58 |
| The amount of kilojoules/calories in food |  |  |
| Not at all/not very concerned (%) | 19 | 23 |
| Somewhat concerned (%) | 39 | 39 |
| Very/Extremely concerned (%) | 42 | 38 |
