# Supplementary material
Source: HighWire-hosted journal article supplement (https://nutrition.bmj.com/content/bmjnph-2018-000018)
Supplement: inline-supplementary-material-7 [file inline-supplementary-material-7.docx]

**Supplementary table 6.** Parents/caregivers’ and other adults’ responses to salt-related attitude statements

| Question | Parents/caregivers of a child/children <18 years of age (n=840) | Other adults  (n=1558) |
| --- | --- | --- |
| I believe salt needs to be added to food to make it tasty |  |  |
| Disagree/strongly disagree (%) | 34 | 39 |
| Neither agree nor disagree (%) | 25 | 24 |
| Agree/strongly agree (%) | 41 | 37 |
| My health would improve if I reduced the amount of salt in my diet |  |  |
| Disagree/strongly disagree (%) | 19 | 21 |
| Neither agree nor disagree (%) | 38 | 40 |
| Agree/strongly agree (%) | 43 | 39 |
| It is hard to understand sodium information displayed on food labels |  |  |
| Disagree/strongly disagree (%) | 20 | 27 |
| Neither agree nor disagree (%) | 29 | 29 |
| Agree/strongly agree (%) | 51 | 44 |
| When eating out at restaurants/cafes/pubs, I find that lower salt options are not readily available or only in limited variety |  |  |
| Disagree/strongly disagree (%) | 8 | 8 |
| Neither agree nor disagree (%) | 33 | 34 |
| Agree/strongly agree (%) | 59 | 58 |
| There should be laws which limit the amount of salt added to manufactured foods |  |  |
| Disagree/strongly disagree (%) | 11 | 13 |
| Neither agree nor disagree (%) | 27 | 26 |
| Agree/strongly agree (%) | 62 | 61 |
